# Supplementary material for: A square planar silylene nickel four-membered ring
Source: Royal Society of Chemistry journal article supplement (doi:10.1039/d1dt02846d), 2021-01-01
Supplement: d1dt02846d1.pdf [file d1dt02846d1.pdf]

Supporting Information

## A Square Planar Silylene Nickel Four-Membered Ring

Sebastian Kaufmann, Ralf Köppe and Peter W. Roesky

## Content

|                                     |     |
|-------------------------------------|-----|
| Experimental .....                  | S3  |
| Mass Spectrum .....                 | S4  |
| IR Spectra.....                     | S5  |
| RAMAN Spectra.....                  | S6  |
| Crystallographic Appendix.....      | S7  |
| Ortep Plots.....                    | S9  |
| Quantum Chemical Calculations ..... | S10 |
| References.....                     | S21 |

## Experimental

### General Procedures

All manipulations were performed under exclusion of moisture and oxygen in flame-dried Schlenk-type glassware or in an argon-filled *MBraun* glovebox. THF was distilled under nitrogen from potassium/benzophenone prior to use. The IR spectra were recorded with a Bruker FTIR spectrometer Tensor 37 using a DTGS detector with as CsI window. For the mid (4000 to 400  $\text{cm}^{-1}$ ) and far (1500 to 200  $\text{cm}^{-1}$ ) infrared ranges beamsplitters made of KBr and silicon were used. Samples were measured by using the attenuated total reflection (ATR, diamond) technique on bulk material. The Raman spectra were recorded with a Bruker Raman microscope Senterra II using an excitation laser with wavelengths of 532 or 785 nm. Elemental analyses were carried out with a Micro Cube from Elementar Analysensysteme GmbH. Because of the air-sensitive nature of some reported complexes, only slightly deviating elemental analyses could be obtained. Experimental procedure for X-ray analysis is given below in the crystallographic appendix.

$[\text{PhC}(\text{NtBu})_2\text{Si}(\text{C}_5\text{Me}_5)]^1$  was synthesized according to the literature known methods.  $[\text{Ni}(\text{cod})_2]$  was used as received without further purification.

### Synthesis of $[\text{PhC}(\text{NtBu})_2\text{SiNi}(\text{C}_5\text{Me}_5)]_2$

Onto a mixture of 100 mg  $[\text{PhC}(\text{NtBu})_2\text{Si}(\text{C}_5\text{Me}_5)]$  (0.254 mmol, 1.00 eq.) and 70 mg  $[\text{Ni}(\text{cod})_2]$  (0.254 mmol, 1.00 eq.) THF was condensed at  $-88\text{ }^\circ\text{C}$ . Afterwards the mixture was stirred until it reached ambient temperature, and everything was dissolved. During this process, the colour of the solution changed from yellow to deep green and ended up dark red almost black. After reaching room temperature the mixture was no longer stirred and X-ray suitable crystals formed overnight. The product was isolated as deep red crystals in 45% yield (52 mg, 0.057 mmol).

NMR measurements were not possible due to the insolubility of the product in common organic solvents.

EI-MS (70 eV):  $m/z$  (%) = 904 ( $[\text{M}]^+$ , 1), 453 ( $1/2[\text{MH}]^+$ , 1), 384 ( $1/2[\text{M}]^+ - \text{NtBu}$ , 6), 328 ( $1/2[\text{M}]^+ - \text{NtBu} - \text{tBu}$ , 44), 231 ( $[\text{PhC}(\text{tBuN})_2]^+$ , 26), 175 ( $[\text{PhC}(\text{NH})(\text{NtBu})]^+$ , 32), 161 ( $[\text{PhC}(\text{NH})\text{tBu}]^+$ , 44), 119 ( $[\text{PhC}(\text{NH})_2]^+$ , 100).

IR (ATR,  $\text{cm}^{-1}$ ): 2952 (s), 2923 (s), 2895 (s), 2852 (s), 1411 (vs), 1389 (m), 1356 (m), 1263 (m), 1203 (w), 787 (w), 744 (m), 706 (m), 602 (w), 502 (m), 423 (w), 374 (w), 308 (w).

RAMAN (excitation wavelength 532 nm,  $\text{cm}^{-1}$ ): 2528, 2425, 1600, 1512, 1068, 751, 625, 465, 357, 297, 201, 128, 98.

Elemental analysis (calcd for  $\text{C}_{50}\text{H}_{76}\text{N}_4\text{Si}_2\text{Ni}_2$ ): C 65.03 (66.23), H: 8.12 (8.45), N: 5.92 (6.18), due to the formation of silicon carbide carbon values were always too low.

# Mass Spectrum

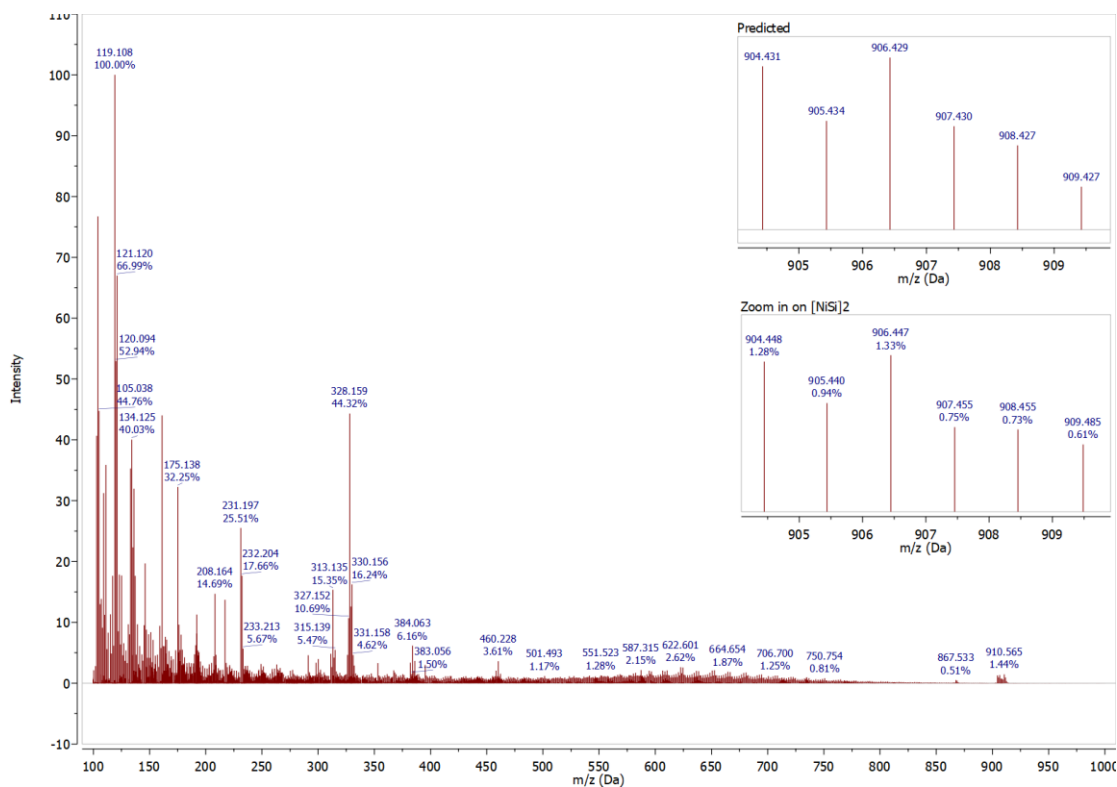

Figure S 1: EI mass spectrum of  $[\text{PhC}(\text{NtBu})_2\text{SiNi}(\text{C}_5\text{Me}_5)]_2$ . The signals between 500 and 800 Da are residual noise from measurements prior to this spectrum. The inset shows the simulated and the measured  $[\text{M}]^+$  peak.

Z:\Auenland\Masse\SiNi2pos1

09/15/21 09:33:18

SiNi2pos1 #1 RT: 0.03 AV: 1 NL: 2.99E8  
T: FTMS + p ESI Full ms [100.0000-1100.0000]

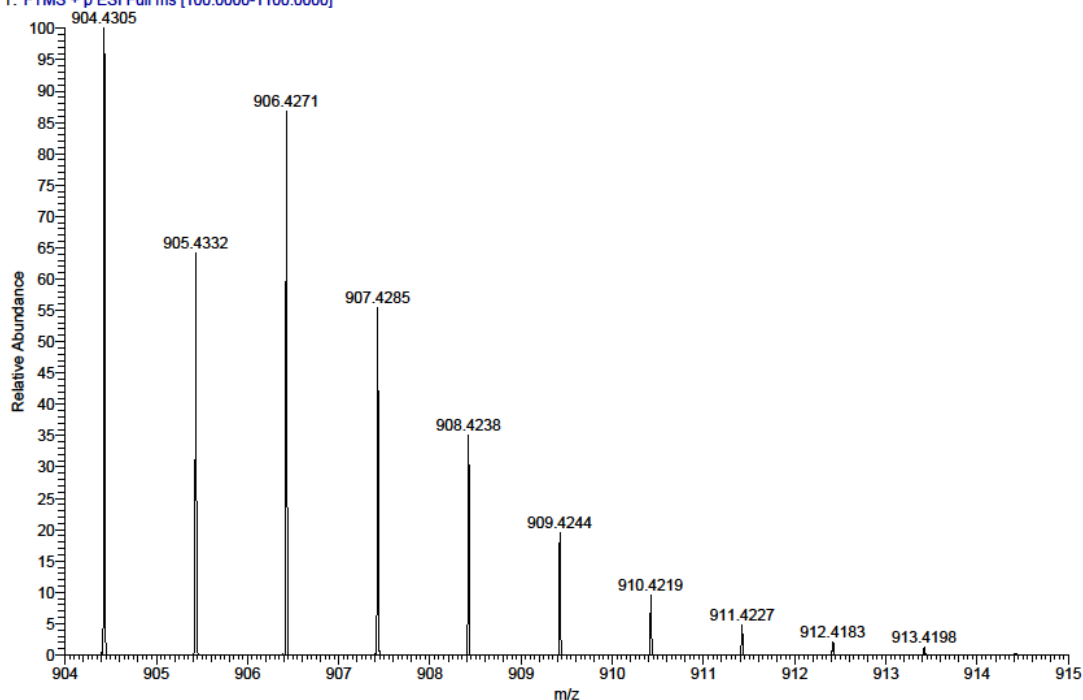

Figure S 2: ESI mass spectrum of  $[\text{PhC}(\text{NtBu})_2\text{SiNi}(\text{C}_5\text{Me}_5)]_2$ .

# IR Spectra

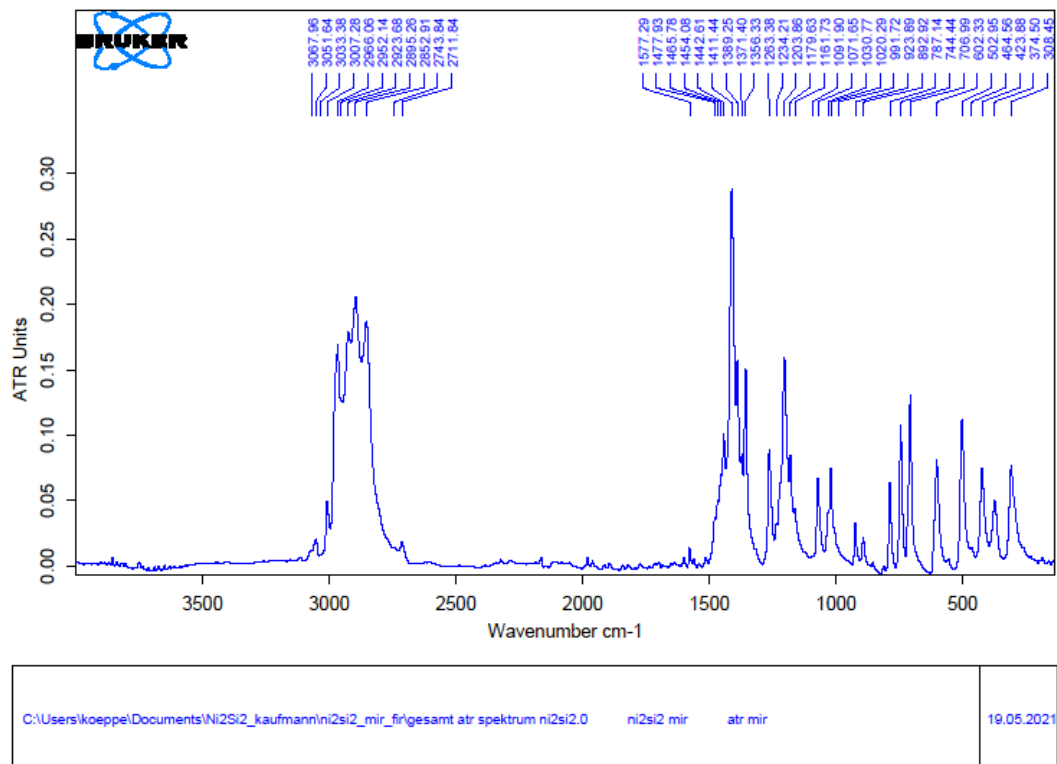

Seite 1 von 1

Figure S 3: ATR-IR spectrum of  $[PhC(NtBu)_2SiNi(C_5Me_5)]_2$ .

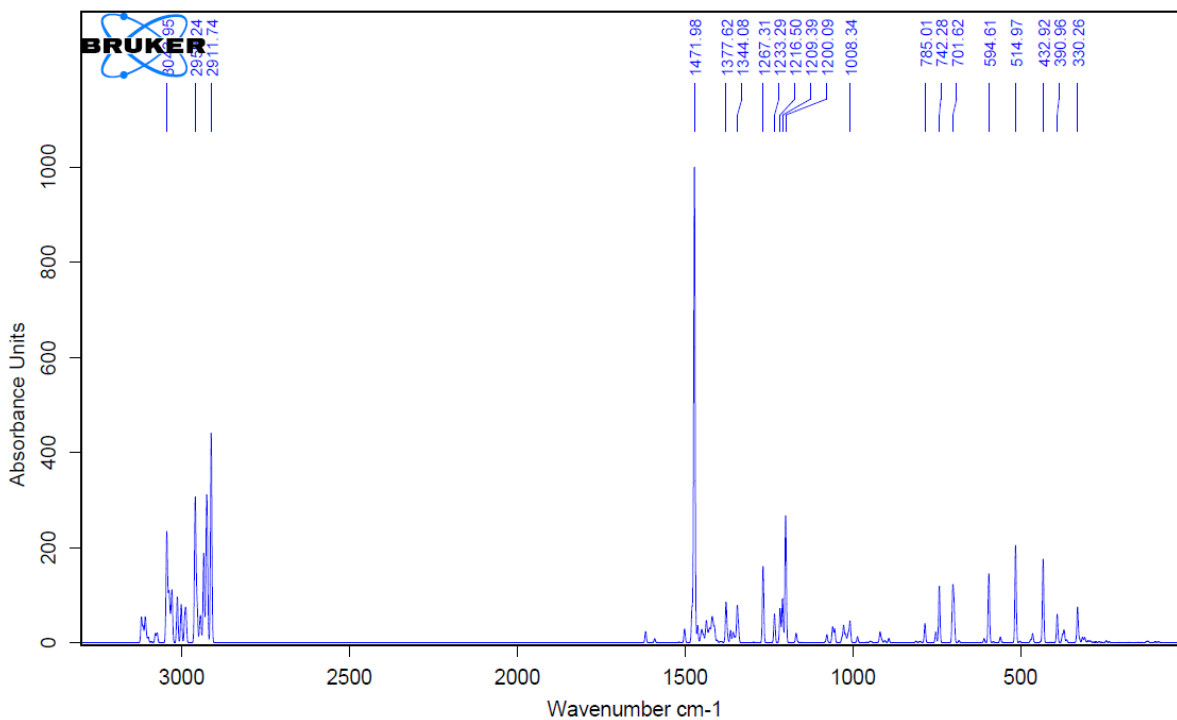

Figure S 4: Theoretical IR spectrum of  $[PhC(NtBu)_2SiNi(C_5Me_5)]_2$ .

# RAMAN Spectra

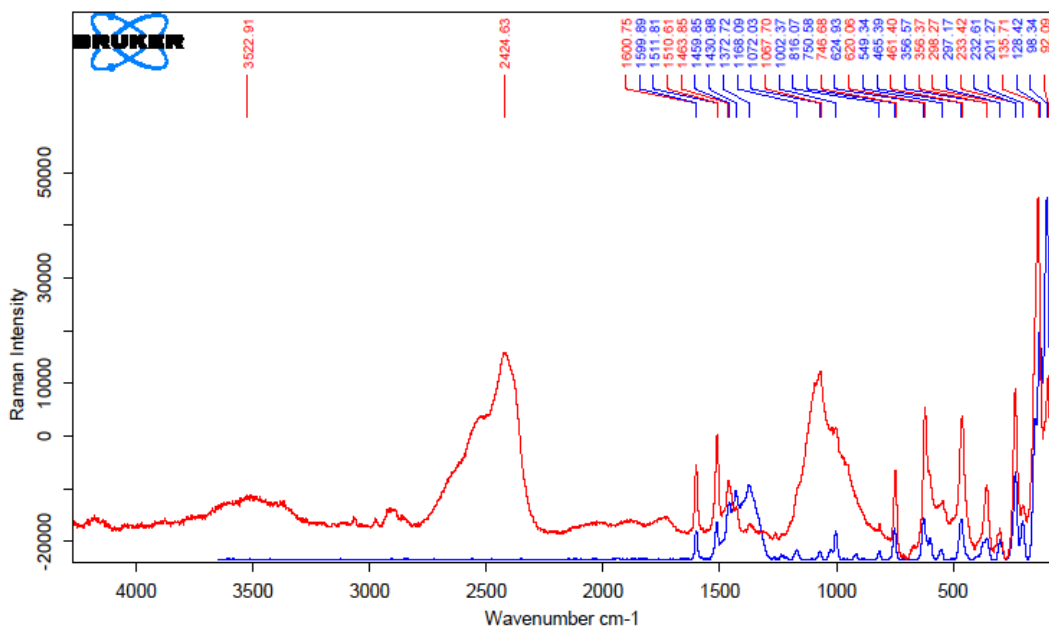

|                                                                                       |            |             |            |
|---------------------------------------------------------------------------------------|------------|-------------|------------|
| C:\Users\koeppel\Documents\Ni2Si2_kaufmann\ni2si2_raman\EXTRACT_ni2si2_532.2_000000.0 | ni2si2_532 | Senterra II | 17.05.2021 |
| C:\Users\koeppel\Documents\Ni2Si2_kaufmann\ni2si2_raman\EXTRACT_ni2si2_785.1_000000.0 | ni2si2_785 | Senterra II | 17.05.2021 |

Seite 1 von 1

Figure S 5: Raman spectra of  $[PhC(NtBu)_2SiNi(C_5Me_5)]_2$  (excitation wavelengths 532 (blue) and 785 (red) nm).

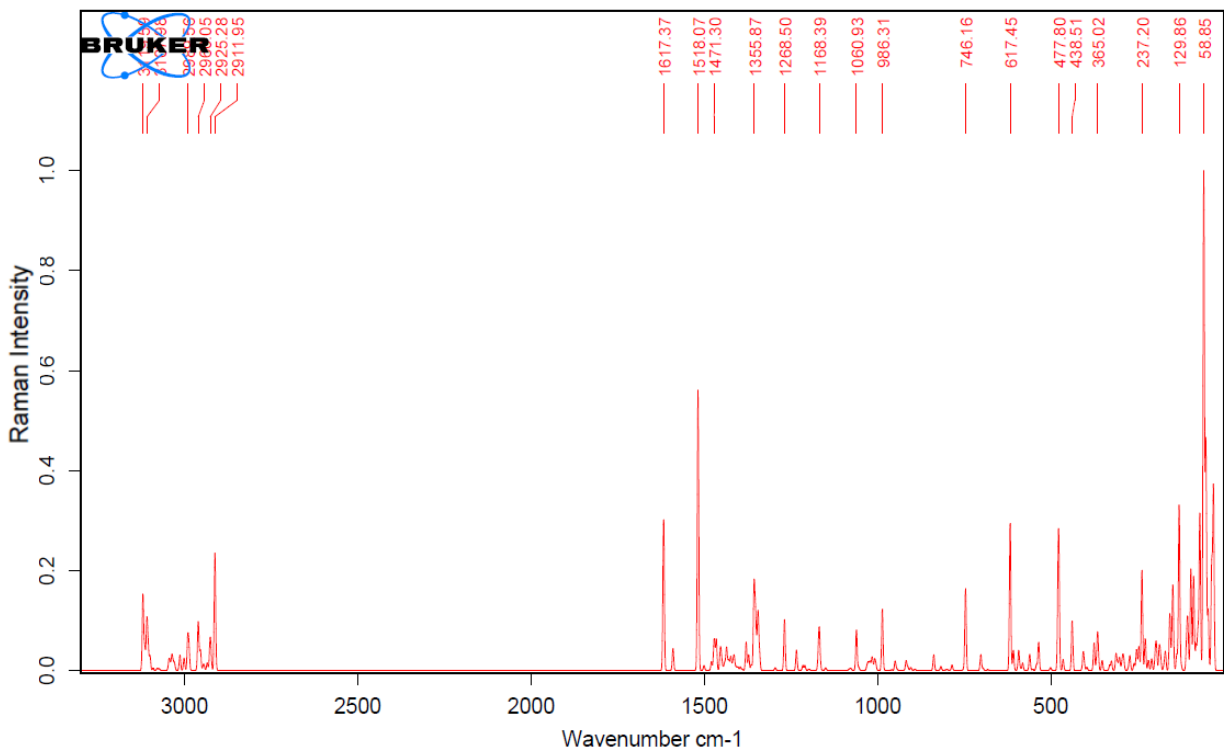

Figure S 6: Theoretical Raman spectrum of  $[PhC(NtBu)_2SiNi(C_5Me_5)]_2$

## Crystallographic Appendix

A suitable crystal was covered in mineral oil (Aldrich) and mounted on a glass fiber or a mylar loop. The crystal was transferred directly to the cold stream of a STOE IPDS 2 diffractometer. All structures were solved by using the program SHELXS/T<sup>2,3</sup> using Olex2.<sup>4</sup> The remaining non-hydrogen atoms were located from successive difference Fourier map calculations. The refinements were carried out by using full-matrix least-squares techniques on  $F^2$  by using the program SHELXL.<sup>2,5</sup> In each case, the locations of the largest peaks in the final difference Fourier map calculations, as well as the magnitude of the residual electron densities, were of no chemical significance.

Crystallographic data for the structures reported in this paper have been deposited with the Cambridge Crystallographic Data Centre as a supplementary publication no. 2105223. Copies of the data can be obtained free of charge on application to CCDC, 12 Union Road, Cambridge CB21EZ, UK (fax: +(44)1223-336-033; email: [deposit@ccdc.cam.ac.uk](mailto:deposit@ccdc.cam.ac.uk)).

| Compound                                       | [PhC(NtBu) <sub>2</sub> SiNi(C <sub>5</sub> Me <sub>5</sub> )] <sub>2</sub>    |
|------------------------------------------------|--------------------------------------------------------------------------------|
| Formula                                        | C <sub>50</sub> H <sub>76</sub> N <sub>4</sub> Ni <sub>2</sub> Si <sub>2</sub> |
| <i>D</i> <sub>calc.</sub> / g cm <sup>-3</sup> | 1.249                                                                          |
| <i>μ</i> /mm <sup>-1</sup>                     | 0.868                                                                          |
| Formula Weight                                 | 906.74                                                                         |
| Colour                                         | red                                                                            |
| Shape                                          | plate                                                                          |
| Size/mm <sup>3</sup>                           | 0.21×0.14×0.04                                                                 |
| <i>T</i> /K                                    | 150                                                                            |
| Crystal System                                 | triclinic                                                                      |
| Space Group                                    | <i>P</i> -1                                                                    |
| <i>a</i> /Å                                    | 10.265(2)                                                                      |
| <i>b</i> /Å                                    | 11.626(2)                                                                      |
| <i>c</i> /Å                                    | 12.091(2)                                                                      |
| <i>α</i> /°                                    | 83.66(3)                                                                       |
| <i>β</i> /°                                    | 68.19(3)                                                                       |
| <i>γ</i> /°                                    | 64.34(3)                                                                       |
| <i>V</i> /Å <sup>3</sup>                       | 1205.2(6)                                                                      |
| <i>Z</i>                                       | 1                                                                              |
| <i>Z</i> '                                     | 0.5                                                                            |
| Wavelength/Å                                   | 0.71073                                                                        |
| Radiation type                                 | MoK <sub>α</sub>                                                               |
| <i>θ</i> <sub>min</sub> /°                     | 1.947                                                                          |
| <i>θ</i> <sub>max</sub> /°                     | 27.716                                                                         |
| Measured Refl.                                 | 11352                                                                          |
| Independent Refl.                              | 4741                                                                           |
| Reflections with <i>I</i> > 2( <i>I</i> )      | 3263                                                                           |
| <i>R</i> <sub>int</sub>                        | 0.0774                                                                         |
| Parameters                                     | 273                                                                            |
| Restraints                                     | 0                                                                              |
| Largest Peak                                   | 0.914                                                                          |
| Deepest Hole                                   | -0.351                                                                         |
| Goof                                           | 0.892                                                                          |
| <i>wR</i> <sub>2</sub> (all data)              | 0.1133                                                                         |
| <i>wR</i> <sub>2</sub>                         | 0.1068                                                                         |
| <i>R</i> <sub>1</sub> (all data)               | 0.0714                                                                         |
| <i>R</i> <sub>1</sub>                          | 0.0464                                                                         |



## Ortep Plots

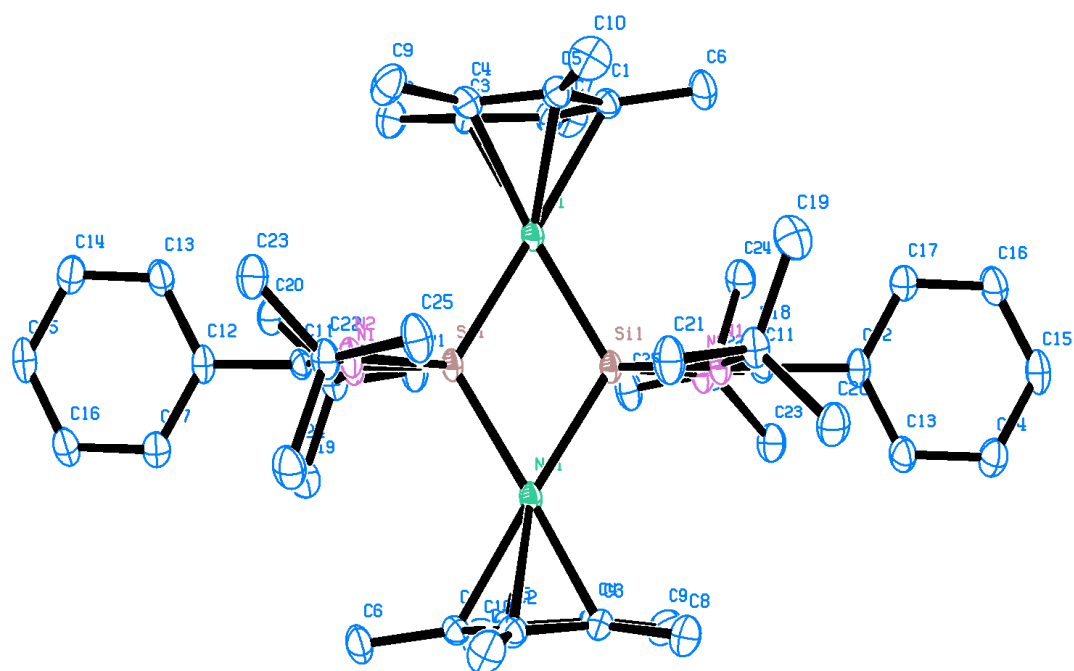

Figure S 7: Ortep plot of the solid-state structure of  $[\text{PhC}(\text{NtBu})_2\text{SiNi}(\text{C}_5\text{Me}_5)]_2$ . Ellipsoids are displayed at 50% probability.

# Quantum Chemical Calculations

Table S 1: Coordinates of the molecule Ni<sub>2</sub>Si<sub>2</sub> (given in atomic units).

|                   |                   |                   |    |
|-------------------|-------------------|-------------------|----|
| 1.17168905193077  | -2.25222166276087 | 2.29800468649534  | ni |
| 0.67308944797225  | -1.39979583103823 | -1.71758429493157 | si |
| -0.67308944797225 | 1.39979583103823  | 1.71758429493157  | si |
| 4.16339191502129  | -3.19697464763585 | 4.94362483368674  | c  |
| 1.60468189864437  | -6.19434829954309 | 2.95744241330451  | c  |
| 0.18100627448540  | -5.16217817293085 | 5.01248565431217  | c  |
| 1.73123563634372  | -3.24167004283548 | 6.20742153626859  | c  |
| 4.05583551510032  | -4.97981904213929 | 2.91159204118965  | c  |
| -1.17168905193077 | 2.25222166276087  | -2.29800468649534 | ni |
| 3.39620592522497  | -2.39882527412535 | -3.92606819411147 | n  |
| -0.27127683839053 | -4.21808674841843 | -3.81925584741967 | n  |
| -3.39620592522497 | 2.39882527412535  | 3.92606819411147  | n  |
| 0.27127683839053  | 4.21808674841843  | 3.81925584741967  | n  |
| 6.51233378263779  | -1.77730378026554 | 5.69829427278720  | c  |
| 0.88892896795074  | -8.40654708011629 | 1.34017278551968  | c  |
| -2.35399464319454 | -6.14735378618860 | 5.85532573093956  | c  |
| 1.02895457217020  | -1.74530275260845 | 8.52687708187992  | c  |
| 6.19955743604441  | -5.77074697032933 | 1.23819903092903  | c  |
| -4.16339191502129 | 3.19697464763585  | -4.94362483368674 | c  |
| -1.60468189864437 | 6.19434829954309  | -2.95744241330451 | c  |
| -0.18100627448540 | 5.16217817293085  | -5.01248565431217 | c  |
| -1.73123563634372 | 3.24167004283548  | -6.20742153626859 | c  |
| -4.05583551510032 | 4.97981904213929  | -2.91159204118965 | c  |
| 1.97604839554925  | -4.20913485573324 | -5.00801043796624 | c  |
| 5.84521446290651  | -1.29706338663978 | -4.65827439193746 | c  |
| -2.67621687754148 | -5.47573009436577 | -4.43667617130531 | c  |
| -1.97604839554925 | 4.20913485573324  | 5.00801043796624  | c  |
| -5.84521446290651 | 1.29706338663978  | 4.65827439193746  | c  |

|                   |                    |                   |   |
|-------------------|--------------------|-------------------|---|
| 2.67621687754148  | 5.47573009436577   | 4.43667617130531  | c |
| 7.00404494219393  | -0.23397463650354  | 4.35690971836451  | h |
| 8.16953047333237  | -3.07380081959774  | 5.78530038875090  | h |
| 6.32322388822246  | -0.90792288969012  | 7.59857438477650  | h |
| -1.18205448489978 | -8.74170257611171  | 1.34832732627536  | h |
| 1.81932808067207  | -10.18135218304160 | 2.00265654991244  | h |
| 1.46281615948595  | -8.09263071438214  | -0.65375516459675 | h |
| -2.87231824715779 | -5.43979098096667  | 7.76125583679610  | h |
| -2.33278495401071 | -8.24956828761237  | 5.97245699823104  | h |
| -3.91556935530289 | -5.61570670517661  | 4.55175563475718  | h |
| 0.09123617797445  | 0.07399249269944   | 8.05167028793235  | h |
| 2.72259646674555  | -1.28811838098080  | 9.68436497168758  | h |
| -0.28982916424332 | -2.82055101551157  | 9.76064423602507  | h |
| 5.53651529357338  | -6.08128913329527  | -0.72790934610568 | h |
| 7.08275421124998  | -7.56649175718017  | 1.90838032141322  | h |
| 7.70941816329697  | -4.31583331514694  | 1.16291274995849  | h |
| -6.51233378263779 | 1.77730378026554   | -5.69829427278720 | c |
| -0.88892896795074 | 8.40654708011629   | -1.34017278551968 | c |
| 2.35399464319454  | 6.14735378618860   | -5.85532573093956 | c |
| -1.02895457217020 | 1.74530275260845   | -8.52687708187992 | c |
| -6.19955743604441 | 5.77074697032933   | -1.23819903092903 | c |
| 2.79196711289804  | -5.97725621722974  | -7.04447561818366 | c |
| 6.54467869221696  | 0.52290976800999   | -2.49515138159602 | c |
| 7.94753565763232  | -3.28550083031162  | -5.02992434647001 | c |
| 5.51198566732123  | 0.22476117472780   | -7.12467976079564 | c |
| -2.42275811040544 | -8.36139321324315  | -4.78168554440591 | c |
| -3.76441715945115 | -4.30428024097368  | -6.87624279825845 | c |
| -4.44950682732284 | -4.87194099453284  | -2.20754943270871 | c |
| -2.79196711289804 | 5.97725621722974   | 7.04447561818366  | c |
| -6.54467869221696 | -0.52290976800999  | 2.49515138159602  | c |
| -7.94753565763232 | 3.28550083031162   | 5.02992434647001  | c |

|                   |                   |                   |   |
|-------------------|-------------------|-------------------|---|
| -5.51198566732123 | -0.22476117472780 | 7.12467976079564  | c |
| 2.42275811040544  | 8.36139321324315  | 4.78168554440591  | c |
| 3.76441715945115  | 4.30428024097368  | 6.87624279825845  | c |
| 4.44950682732284  | 4.87194099453284  | 2.20754943270871  | c |
| -7.00404494219393 | 0.23397463650354  | -4.35690971836451 | h |
| -8.16953047333237 | 3.07380081959774  | -5.78530038875090 | h |
| -6.32322388822246 | 0.90792288969012  | -7.59857438477650 | h |
| 1.18205448489978  | 8.74170257611171  | -1.34832732627536 | h |
| -1.81932808067207 | 10.18135218304160 | -2.00265654991244 | h |
| -1.46281615948595 | 8.09263071438214  | 0.65375516459675  | h |
| 2.87231824715779  | 5.43979098096667  | -7.76125583679610 | h |
| 2.33278495401071  | 8.24956828761237  | -5.97245699823104 | h |
| 3.91556935530289  | 5.61570670517661  | -4.55175563475718 | h |
| -0.09123617797445 | -0.07399249269944 | -8.05167028793235 | h |
| -2.72259646674555 | 1.28811838098080  | -9.68436497168758 | h |
| 0.28982916424332  | 2.82055101551157  | -9.76064423602507 | h |
| -5.53651529357338 | 6.08128913329527  | 0.72790934610568  | h |
| -7.08275421124998 | 7.56649175718017  | -1.90838032141322 | h |
| -7.70941816329697 | 4.31583331514694  | -1.16291274995849 | h |
| 2.44512927235884  | -5.39654294367663 | -9.62088434808116 | c |
| 3.93615573623113  | -8.28896549885234 | -6.36531104087035 | c |
| 5.02966924063034  | 1.96218311089778  | -2.27964047183942 | h |
| 8.36294741119683  | 1.49565007792096  | -2.89364904264283 | h |
| 6.69095314783487  | -0.50995919965868 | -0.67396991812076 | h |
| 8.19180946179838  | -4.47273708974616 | -3.32250569933774 | h |
| 9.76709806977288  | -2.30358234447666 | -5.40949504052943 | h |
| 7.54692693404479  | -4.54202983192580 | -6.65956234842291 | h |
| 5.09228609342022  | -1.04764050632017 | -8.74020941797789 | h |
| 7.25669707653335  | 1.30797897568024  | -7.57730071815203 | h |
| 3.92644164229907  | 1.56682211805244  | -6.89774225165579 | h |
| -1.24371363274593 | -8.84254274601051 | -6.44858406018523 | h |

|                   |                   |                    |   |
|-------------------|-------------------|--------------------|---|
| -4.33025657784121 | -9.19128194265651 | -5.08671374145463  | h |
| -1.58145393216718 | -9.26611361232489 | -3.09106966111344  | h |
| -3.81386253295732 | -2.22569292779026 | -6.67428255019158  | h |
| -5.71569071030827 | -4.99951197227222 | -7.23792999651609  | h |
| -2.57655759694879 | -4.79159362285858 | -8.53710938962272  | h |
| -3.65196452661618 | -5.59952349196084 | -0.40755615008564  | h |
| -6.35219969280478 | -5.70621352708152 | -2.51556687027597  | h |
| -4.63783057016940 | -2.78727576352570 | -2.01570831467746  | h |
| -2.44512927235884 | 5.39654294367663  | 9.62088434808116   | c |
| -3.93615573623113 | 8.28896549885234  | 6.36531104087035   | c |
| -5.02966924063034 | -1.96218311089778 | 2.27964047183942   | h |
| -8.36294741119683 | -1.49565007792096 | 2.89364904264283   | h |
| -6.69095314783487 | 0.50995919965868  | 0.67396991812076   | h |
| -8.19180946179838 | 4.47273708974616  | 3.32250569933774   | h |
| -9.76709806977288 | 2.30358234447666  | 5.40949504052943   | h |
| -7.54692693404479 | 4.54202983192580  | 6.65956234842291   | h |
| -5.09228609342022 | 1.04764050632017  | 8.74020941797789   | h |
| -7.25669707653335 | -1.30797897568024 | 7.57730071815203   | h |
| -3.92644164229907 | -1.56682211805244 | 6.89774225165579   | h |
| 1.24371363274593  | 8.84254274601051  | 6.44858406018523   | h |
| 4.33025657784121  | 9.19128194265651  | 5.08671374145463   | h |
| 1.58145393216718  | 9.26611361232489  | 3.09106966111344   | h |
| 3.81386253295732  | 2.22569292779026  | 6.67428255019158   | h |
| 5.71569071030827  | 4.99951197227222  | 7.23792999651609   | h |
| 2.57655759694879  | 4.79159362285858  | 8.53710938962272   | h |
| 3.65196452661618  | 5.59952349196084  | 0.40755615008564   | h |
| 6.35219969280478  | 5.70621352708152  | 2.51556687027597   | h |
| 4.63783057016940  | 2.78727576352570  | 2.01570831467746   | h |
| 1.55224839274823  | -3.59481575583005 | -10.15600624332926 | h |
| 3.23320614841093  | -7.10678425294095 | -11.49267107044205 | c |
| 4.20289516491040  | -8.73436068778577 | -4.34934004031555  | h |

|                   |                    |                    |   |
|-------------------|--------------------|--------------------|---|
| 4.72217991094483  | -9.99363526409612  | -8.23714855195823  | c |
| -1.55224839274823 | 3.59481575583005   | 10.15600624332926  | h |
| -3.23320614841093 | 7.10678425294095   | 11.49267107044205  | c |
| -4.20289516491040 | 8.73436068778577   | 4.34934004031555   | h |
| -4.72217991094483 | 9.99363526409612   | 8.23714855195823   | c |
| 2.95388933364779  | -6.63651082680101  | -13.50278480908517 | h |
| 4.37193389137546  | -9.40619650550298  | -10.80606250189736 | c |
| 5.61392706863125  | -11.79394905037564 | -7.68687870216997  | h |
| -2.95388933364779 | 6.63651082680101   | 13.50278480908517  | h |
| -4.37193389137546 | 9.40619650550298   | 10.80606250189736  | c |
| -5.61392706863125 | 11.79394905037564  | 7.68687870216997   | h |
| 4.98904374735600  | -10.74576671454267 | -12.27732999724776 | h |
| -4.98904374735600 | 10.74576671454267  | 12.27732999724776  | h |

Table S 2: Vibrational Frequencies, IR intensities and Raman cross sections of  $[\text{PhC}(\text{NtBu})_2\text{SiNi}(\text{C}_5\text{Me}_5)]_2$ .

| $\nu/\text{cm}^{-1}$ |       | IR intensity/<br>$\text{km}\cdot\text{mol}^{-1}$ | Raman cross<br>scattering/% |
|----------------------|-------|--------------------------------------------------|-----------------------------|
| -9.42                | $a_g$ | 0                                                | 0                           |
| 30.31                | $a_u$ | 0.08931                                          | 8.72E-17                    |
| 30.86                | $a_g$ | 0                                                | 25.9375166                  |
| 35.93                | $a_g$ | 0                                                | 17.4086381                  |
| 36.28                | $a_u$ | 0.22785                                          | 1.28E-17                    |
| 46.28                | $a_g$ | 0                                                | 9.45148736                  |
| 52.78                | $a_g$ | 0                                                | 35.0323569                  |
| 58.88                | $a_g$ | 0                                                | 100                         |
| 60.82                | $a_u$ | 0.00887                                          | 0                           |
| 63.68                | $a_u$ | 0.00887                                          | 0                           |
| 70.11                | $a_g$ | 0                                                | 23.5769397                  |
| 73.48                | $a_u$ | 0.07613                                          | 3.09E-18                    |
| 75.66                | $a_g$ | 0                                                | 6.37397486                  |
| 80.28                | $a_u$ | 0.15677                                          | 0                           |
| 81.02                | $a_g$ | 0                                                | 4.87201372                  |
| 84.92                | $a_u$ | 0.11666                                          | 0                           |
| 87.98                | $a_g$ | 0                                                | 14.7563557                  |
| 88.68                | $a_u$ | 0.71372                                          | 1.51E-17                    |
| 89.72                | $a_u$ | 0.74217                                          | 0                           |
| 95.99                | $a_g$ | 0                                                | 15.4357375                  |
| 98.77                | $a_u$ | 1.04191                                          | 1.50E-19                    |
| 101.89               | $a_u$ | 0.01971                                          | 1.15E-18                    |
| 104.9                | $a_g$ | 0                                                | 6.44145784                  |
| 108.27               | $a_g$ | 0                                                | 4.21850225                  |
| 108.77               | $a_u$ | 0.23306                                          | 2.61E-19                    |
| 120.16               | $a_u$ | 1.84043                                          | 0                           |
| 123.85               | $a_g$ | 0                                                | 0.78317439                  |
| 124.7                | $a_u$ | 1.34578                                          | 1.88E-19                    |
| 129.86               | $a_g$ | 0                                                | 31.0505193                  |
| 136.8                | $a_g$ | 0                                                | 2.32704403                  |
| 140.41               | $a_u$ | 0.31054                                          | 0                           |
| 147.46               | $a_g$ | 0                                                | 9.99347551                  |
| 148.99               | $a_u$ | 0.31567                                          | 2.27E-16                    |

|        |       |         |            |
|--------|-------|---------|------------|
| 149.01 | $a_g$ | 0       | 6.24515405 |
| 152.5  | $a_u$ | 0.15417 | 2.24E-18   |
| 153.94 | $a_g$ | 0       | 1.35428758 |
| 155.4  | $a_u$ | 0.17795 | 3.53E-19   |
| 156.93 | $a_g$ | 0       | 8.32517772 |
| 166.96 | $a_u$ | 0.12606 | 0          |
| 169.64 | $a_g$ | 0       | 2.67310771 |
| 173.67 | $a_g$ | 0       | 0.98442467 |
| 174.83 | $a_u$ | 0.26563 | 5.49E-19   |
| 180.58 | $a_u$ | 0.28667 | 1.99E-19   |
| 183.46 | $a_g$ | 0       | 2.76900259 |
| 185.4  | $a_u$ | 0.06089 | 0          |
| 187.08 | $a_g$ | 0       | 4.34614713 |
| 189.89 | $a_u$ | 0.20356 | 0          |
| 195.54 | $a_g$ | 0       | 4.71732253 |
| 197.08 | $a_u$ | 0.02124 | 0          |
| 198.82 | $a_g$ | 0       | 2.30978446 |
| 201.39 | $a_u$ | 0.16808 | 7.52E-20   |
| 206.25 | $a_u$ | 0.33023 | 0          |
| 209.16 | $a_g$ | 0       | 1.73934649 |
| 218.39 | $a_g$ | 0       | 1.47461138 |
| 224.06 | $a_u$ | 0.07656 | 1.09E-20   |
| 227.63 | $a_g$ | 0       | 4.51145959 |
| 235.5  | $a_u$ | 0.9348  | 0          |
| 237.2  | $a_g$ | 0       | 16.1105674 |
| 244.74 | $a_u$ | 2.37692 | 0          |
| 246    | $a_g$ | 0       | 3.33378853 |
| 252.69 | $a_g$ | 0       | 3.59620972 |
| 259.4  | $a_u$ | 0.53303 | 1.82E-20   |
| 259.71 | $a_g$ | 0       | 1.04702946 |
| 266.07 | $a_u$ | 1.23813 | 0          |
| 271.94 | $a_g$ | 0       | 2.07296811 |
| 275.06 | $a_u$ | 0.73273 | 0          |
| 275.29 | $a_g$ | 0       | 0.98047963 |
| 281.15 | $a_u$ | 0.73994 | 0          |
| 289.06 | $a_u$ | 0.69615 | 0          |

|        |                |           |            |
|--------|----------------|-----------|------------|
| 289.6  | a <sub>g</sub> | 0         | 1.63666158 |
| 292.93 | a <sub>u</sub> | 2.02458   | 6.82E-18   |
| 292.95 | a <sub>g</sub> | 0         | 2.09512104 |
| 296.51 | a <sub>g</sub> | 0         | 0.43943601 |
| 298.69 | a <sub>u</sub> | 2.1101    | 0          |
| 302.01 | a <sub>g</sub> | 0         | 1.81733694 |
| 305.04 | a <sub>u</sub> | 0.84696   | 1.26E-19   |
| 307.22 | a <sub>g</sub> | 0         | 1.06720987 |
| 309.18 | a <sub>u</sub> | 6.27229   | 0          |
| 311.89 | a <sub>g</sub> | 0         | 2.36691171 |
| 315.57 | a <sub>u</sub> | 6.69282   | 0          |
| 324.45 | a <sub>u</sub> | 4.60224   | 1.55E-19   |
| 325.18 | a <sub>g</sub> | 0         | 1.55491575 |
| 330.26 | a <sub>u</sub> | 44.15403  | 1.83E-19   |
| 330.52 | a <sub>g</sub> | 0         | 0.67651789 |
| 334.1  | a <sub>u</sub> | 0.96162   | 0          |
| 351.95 | a <sub>g</sub> | 0         | 1.44540289 |
| 362.55 | a <sub>g</sub> | 0         | 0.42730121 |
| 362.82 | a <sub>u</sub> | 3.26184   | 1.87E-18   |
| 364.22 | a <sub>u</sub> | 0.13008   | 0          |
| 364.62 | a <sub>g</sub> | 0         | 6.16606353 |
| 367.42 | a <sub>g</sub> | 0         | 2.22466259 |
| 370.47 | a <sub>u</sub> | 15.47854  | 0          |
| 375.3  | a <sub>g</sub> | 0         | 3.91101653 |
| 375.53 | a <sub>u</sub> | 9.19962   | 2.04E-19   |
| 390.96 | a <sub>u</sub> | 35.04438  | 0          |
| 396.18 | a <sub>g</sub> | 0         | 0.49880131 |
| 403.5  | a <sub>g</sub> | 0         | 0.69092109 |
| 404.33 | a <sub>u</sub> | 0.31107   | 4.96E-19   |
| 405.38 | a <sub>g</sub> | 0         | 0.75925757 |
| 407.05 | a <sub>g</sub> | 0         | 2.19788182 |
| 410.54 | a <sub>u</sub> | 0.44788   | 0          |
| 432.92 | a <sub>u</sub> | 103.27167 | 0          |
| 438.51 | a <sub>g</sub> | 0         | 8.67237939 |
| 440.18 | a <sub>u</sub> | 1.33673   | 6.48E-20   |
| 464.04 | a <sub>u</sub> | 11.04175  | 0          |

|        |                |           |            |
|--------|----------------|-----------|------------|
| 464.63 | a <sub>g</sub> | 0         | 1.9994917  |
| 469.86 | a <sub>u</sub> | 3.47402   | 0          |
| 477.11 | a <sub>g</sub> | 0         | 19.824218  |
| 479.19 | a <sub>g</sub> | 0         | 10.7531617 |
| 500.95 | a <sub>g</sub> | 0         | 0.51679298 |
| 501.88 | a <sub>u</sub> | 1.79928   | 3.99E-21   |
| 514.97 | a <sub>u</sub> | 120.14595 | 0          |
| 533.81 | a <sub>u</sub> | 0.16134   | 9.51E-19   |
| 535.27 | a <sub>g</sub> | 0         | 5.28650871 |
| 540.23 | a <sub>u</sub> | 0.01233   | 0          |
| 541.37 | a <sub>g</sub> | 0         | 0.83847327 |
| 551.91 | a <sub>u</sub> | 0.2513    | 1.43E-19   |
| 551.97 | a <sub>g</sub> | 0         | 0.19015105 |
| 560.2  | a <sub>u</sub> | 6.91365   | 7.45E-21   |
| 561.09 | a <sub>g</sub> | 0         | 2.67925287 |
| 580.81 | a <sub>u</sub> | 1.01776   | 0          |
| 581.36 | a <sub>g</sub> | 0         | 1.25264583 |
| 587.36 | a <sub>u</sub> | 0.08119   | 1.58E-20   |
| 587.85 | a <sub>g</sub> | 0         | 0.32324692 |
| 592.79 | a <sub>g</sub> | 0         | 3.31425298 |
| 593.09 | a <sub>u</sub> | 4.59525   | 5.70E-20   |
| 594.67 | a <sub>u</sub> | 83.3162   | 0          |
| 608.18 | a <sub>g</sub> | 0         | 2.89156444 |
| 608.58 | a <sub>u</sub> | 4.93041   | 0          |
| 617.45 | a <sub>g</sub> | 0         | 25.05102   |
| 681.86 | a <sub>g</sub> | 0         | 0.10819241 |
| 683.57 | a <sub>u</sub> | 2.43675   | 0          |
| 696    | a <sub>g</sub> | 0         | 0.33632246 |
| 698.34 | a <sub>u</sub> | 44.16692  | 0          |
| 702.09 | a <sub>g</sub> | 0         | 2.6301295  |
| 702.25 | a <sub>u</sub> | 63.991    | 0          |
| 742.28 | a <sub>u</sub> | 70.48546  | 0          |
| 746.15 | a <sub>g</sub> | 0         | 15.3912799 |
| 750.73 | a <sub>g</sub> | 0         | 0.5342498  |
| 752.62 | a <sub>u</sub> | 13.25194  | 0          |
| 785.01 | a <sub>u</sub> | 23.38958  | 0          |



|         |                |         |            |
|---------|----------------|---------|------------|
| 785.23  | a <sub>g</sub> | 0       | 0.90646077 |
| 799.45  | a <sub>g</sub> | 0       | 0.18077019 |
| 799.5   | a <sub>u</sub> | 1.72128 | 1.25E-19   |
| 804.02  | a <sub>g</sub> | 0       | 0.05389307 |
| 804.53  | a <sub>u</sub> | 0.46396 | 0          |
| 811.62  | a <sub>u</sub> | 1.81083 | 0          |
| 817.19  | a <sub>g</sub> | 0       | 0.58354766 |
| 837.77  | a <sub>u</sub> | 0.01957 | 6.46E-19   |
| 837.81  | a <sub>g</sub> | 0       | 2.74244942 |
| 892.09  | a <sub>g</sub> | 0       | 0.18298928 |
| 892.71  | a <sub>u</sub> | 5.11296 | 4.21E-20   |
| 903.4   | a <sub>g</sub> | 0       | 0.22717376 |
| 903.67  | a <sub>u</sub> | 2.06236 | 0          |
| 904.81  | a <sub>g</sub> | 0       | 0.17651031 |
| 905.93  | a <sub>u</sub> | 0.60957 | 0          |
| 912.52  | a <sub>g</sub> | 0       | 0.46642921 |
| 912.75  | a <sub>u</sub> | 1.93829 | 0          |
| 915.43  | a <sub>g</sub> | 0       | 0.22840431 |
| 915.55  | a <sub>u</sub> | 3.25442 | 8.15E-20   |
| 917.6   | a <sub>g</sub> | 0       | 1.80759572 |
| 918.43  | a <sub>u</sub> | 4.22842 | 8.50E-21   |
| 919.25  | a <sub>u</sub> | 8.45375 | 9.40E-21   |
| 919.45  | a <sub>g</sub> | 0       | 0.14605458 |
| 944.16  | a <sub>g</sub> | 0       | 0.17995463 |
| 944.16  | a <sub>u</sub> | 0.81545 | 2.86E-18   |
| 946.94  | a <sub>u</sub> | 0.62088 | 6.46E-21   |
| 947.03  | a <sub>g</sub> | 0       | 0.10469536 |
| 948.86  | a <sub>u</sub> | 1.21149 | 6.40E-20   |
| 949.33  | a <sub>g</sub> | 0       | 1.74684586 |
| 958.72  | a <sub>g</sub> | 0       | 0.09308935 |
| 958.72  | a <sub>u</sub> | 0.44797 | 1.50E-19   |
| 982.16  | a <sub>g</sub> | 0       | 0.05383845 |
| 982.17  | a <sub>u</sub> | 0.40978 | 8.53E-19   |
| 986.22  | a <sub>u</sub> | 7.08878 | 1.12E-19   |
| 986.32  | a <sub>g</sub> | 0       | 13.0660567 |
| 1004.99 | a <sub>g</sub> | 0       | 0.90712839 |

|         |                |          |            |
|---------|----------------|----------|------------|
| 1005.33 | a <sub>u</sub> | 0.57575  | 0          |
| 1008.24 | a <sub>u</sub> | 26.19983 | 0          |
| 1008.53 | a <sub>g</sub> | 0        | 1.8737814  |
| 1013.12 | a <sub>u</sub> | 11.60299 | 0          |
| 1014.8  | a <sub>g</sub> | 0        | 2.24571166 |
| 1016.94 | a <sub>u</sub> | 3.46342  | 2.93E-21   |
| 1017.25 | a <sub>g</sub> | 0        | 0.8439546  |
| 1021.02 | a <sub>u</sub> | 0.95626  | 1.54E-21   |
| 1021.53 | a <sub>u</sub> | 4.25575  | 9.78E-20   |
| 1021.55 | a <sub>g</sub> | 0        | 0.80401484 |
| 1021.78 | a <sub>g</sub> | 0        | 0.40195811 |
| 1022.11 | a <sub>u</sub> | 5.02171  | 2.39E-19   |
| 1022.15 | a <sub>g</sub> | 0        | 0.49853958 |
| 1025.5  | a <sub>g</sub> | 0        | 0.96334904 |
| 1026.29 | a <sub>u</sub> | 2.81698  | 0          |
| 1027.5  | a <sub>u</sub> | 18.95166 | 0          |
| 1028.2  | a <sub>g</sub> | 0        | 0.88524858 |
| 1030.61 | a <sub>g</sub> | 0        | 0.51411491 |
| 1032.44 | a <sub>u</sub> | 5.84518  | 0          |
| 1054.16 | a <sub>u</sub> | 16.88869 | 6.54E-20   |
| 1054.55 | a <sub>g</sub> | 0        | 0.44591119 |
| 1059.46 | a <sub>g</sub> | 0        | 0.25833959 |
| 1059.6  | a <sub>u</sub> | 13.32158 | 7.17E-21   |
| 1060.98 | a <sub>g</sub> | 0        | 6.17228456 |
| 1060.98 | a <sub>u</sub> | 7.20615  | 1.11E-17   |
| 1077.21 | a <sub>u</sub> | 9.82833  | 2.52E-19   |
| 1077.24 | a <sub>g</sub> | 0        | 0.32975245 |
| 1081.88 | a <sub>g</sub> | 0        | 0.21478101 |
| 1081.99 | a <sub>u</sub> | 0.56854  | 1.19E-19   |
| 1149.94 | a <sub>g</sub> | 0        | 0.41390324 |
| 1149.94 | a <sub>u</sub> | 0.20165  | 6.45E-16   |
| 1156.01 | a <sub>u</sub> | 0.26681  | 0          |
| 1157.33 | a <sub>g</sub> | 0        | 0.04771074 |
| 1163.83 | a <sub>u</sub> | 0.3343   | 0          |
| 1164.8  | a <sub>g</sub> | 0        | 0.37474111 |
| 1166.76 | a <sub>u</sub> | 2.1189   | 0          |

|         |                |           |            |
|---------|----------------|-----------|------------|
| 1167.76 | a <sub>g</sub> | 0         | 7.63346762 |
| 1169.05 | a <sub>u</sub> | 10.3849   | 0          |
| 1170.57 | a <sub>g</sub> | 0         | 3.11271442 |
| 1197.71 | a <sub>g</sub> | 0         | 0.19391401 |
| 1200.09 | a <sub>u</sub> | 157.06239 | 0          |
| 1209.38 | a <sub>u</sub> | 55.2283   | 0          |
| 1209.77 | a <sub>g</sub> | 0         | 0.86371775 |
| 1215.42 | a <sub>g</sub> | 0         | 0.69188839 |
| 1216.52 | a <sub>u</sub> | 42.95522  | 0          |
| 1233.27 | a <sub>u</sub> | 34.91227  | 0          |
| 1233.55 | a <sub>g</sub> | 0         | 1.15595436 |
| 1234.23 | a <sub>g</sub> | 0         | 2.06132265 |
| 1234.47 | a <sub>u</sub> | 0.89422   | 0          |
| 1267.31 | a <sub>u</sub> | 95.37552  | 0          |
| 1268.5  | a <sub>g</sub> | 0         | 11.0317045 |
| 1295.24 | a <sub>g</sub> | 0         | 0.42090569 |
| 1295.35 | a <sub>u</sub> | 0.6025    | 0          |
| 1340.36 | a <sub>g</sub> | 0         | 2.51189203 |
| 1340.92 | a <sub>u</sub> | 16.30748  | 0          |
| 1343.06 | a <sub>u</sub> | 3.77739   | 0          |
| 1344.09 | a <sub>g</sub> | 0         | 3.90900608 |
| 1344.39 | a <sub>g</sub> | 0         | 2.55035619 |
| 1344.45 | a <sub>u</sub> | 35.98777  | 0          |
| 1345.65 | a <sub>g</sub> | 0         | 2.23080775 |
| 1346.02 | a <sub>u</sub> | 3.81803   | 0          |
| 1347.45 | a <sub>g</sub> | 0         | 2.44475044 |
| 1347.56 | a <sub>u</sub> | 1.20065   | 0          |
| 1351.24 | a <sub>u</sub> | 5.32784   | 0          |
| 1351.66 | a <sub>g</sub> | 0         | 6.08917313 |
| 1352.97 | a <sub>g</sub> | 0         | 5.33904606 |
| 1353.08 | a <sub>u</sub> | 1.28102   | 0          |
| 1356.42 | a <sub>g</sub> | 0         | 13.7260927 |
| 1356.68 | a <sub>u</sub> | 12.53604  | 0          |
| 1361.86 | a <sub>g</sub> | 0         | 0.16457655 |
| 1361.87 | a <sub>u</sub> | 0.48992   | 8.59E-22   |
| 1364.2  | a <sub>u</sub> | 14.79055  | 0          |

|         |                |          |            |
|---------|----------------|----------|------------|
| 1364.34 | a <sub>g</sub> | 0        | 1.00012139 |
| 1371.95 | a <sub>g</sub> | 0        | 2.66457276 |
| 1373.66 | a <sub>u</sub> | 8.16707  | 0          |
| 1377.71 | a <sub>u</sub> | 49.67277 | 0          |
| 1379.22 | a <sub>g</sub> | 0        | 5.19178976 |
| 1390.49 | a <sub>g</sub> | 0        | 0.22619129 |
| 1390.82 | a <sub>u</sub> | 1.25897  | 2.78E-21   |
| 1395.78 | a <sub>u</sub> | 1.0726   | 9.05E-21   |
| 1395.9  | a <sub>g</sub> | 0        | 0.53376425 |
| 1402.46 | a <sub>g</sub> | 0        | 0.43959533 |
| 1403.73 | a <sub>u</sub> | 1.78469  | 0          |
| 1404.82 | a <sub>u</sub> | 1.19721  | 0          |
| 1405.25 | a <sub>g</sub> | 0        | 0.15675095 |
| 1407.71 | a <sub>u</sub> | 0.77572  | 0          |
| 1408.41 | a <sub>g</sub> | 0        | 0.55368292 |
| 1411.78 | a <sub>u</sub> | 17.44048 | 0          |
| 1413.33 | a <sub>g</sub> | 0        | 2.33497204 |
| 1415.01 | a <sub>u</sub> | 1.64048  | 8.79E-21   |
| 1415.02 | a <sub>g</sub> | 0        | 0.47581006 |
| 1415.39 | a <sub>g</sub> | 0        | 0.3889774  |
| 1415.69 | a <sub>u</sub> | 6.98622  | 0          |
| 1416.69 | a <sub>u</sub> | 12.16127 | 0          |
| 1417.1  | a <sub>g</sub> | 0        | 0.56978553 |
| 1419.02 | a <sub>g</sub> | 0        | 0.53609335 |
| 1419.82 | a <sub>u</sub> | 25.86477 | 0          |
| 1423.61 | a <sub>g</sub> | 0        | 2.20349591 |
| 1424.69 | a <sub>u</sub> | 13.48141 | 0          |
| 1427.58 | a <sub>u</sub> | 6.66683  | 0          |
| 1428.04 | a <sub>g</sub> | 0        | 0.45012556 |
| 1428.97 | a <sub>g</sub> | 0        | 0.68102814 |
| 1429.05 | a <sub>u</sub> | 6.44631  | 0          |
| 1430.34 | a <sub>g</sub> | 0        | 0.64471478 |
| 1431.18 | a <sub>u</sub> | 2.97709  | 0          |
| 1433.14 | a <sub>u</sub> | 5.50671  | 0          |
| 1434.18 | a <sub>g</sub> | 0        | 1.64994196 |
| 1435.79 | a <sub>g</sub> | 0        | 1.1224784  |

|         |                |           |            |
|---------|----------------|-----------|------------|
| 1435.82 | a <sub>u</sub> | 17.94276  | 2.11E-19   |
| 1436.2  | a <sub>g</sub> | 0         | 1.46839035 |
| 1437.45 | a <sub>u</sub> | 4.42318   | 0          |
| 1437.86 | a <sub>u</sub> | 4.32177   | 0          |
| 1439.14 | a <sub>u</sub> | 3.53874   | 0          |
| 1440.48 | a <sub>g</sub> | 0         | 1.09732875 |
| 1441.58 | a <sub>g</sub> | 0         | 0.33943677 |
| 1444.4  | a <sub>g</sub> | 0         | 0.23971444 |
| 1444.86 | a <sub>u</sub> | 9.71496   | 0          |
| 1445.56 | a <sub>g</sub> | 0         | 0.20992937 |
| 1449.8  | a <sub>u</sub> | 13.5063   | 4.36E-21   |
| 1449.97 | a <sub>g</sub> | 0         | 1.40287988 |
| 1450.17 | a <sub>u</sub> | 1.16556   | 0          |
| 1452.87 | a <sub>u</sub> | 2.48423   | 0          |
| 1453.01 | a <sub>g</sub> | 0         | 3.96237795 |
| 1454    | a <sub>u</sub> | 3.75011   | 0          |
| 1454.75 | a <sub>g</sub> | 0         | 1.40515207 |
| 1462.44 | a <sub>u</sub> | 21.71122  | 0          |
| 1465.36 | a <sub>g</sub> | 0         | 5.43183042 |
| 1470.28 | a <sub>g</sub> | 0         | 1.92005978 |
| 1470.3  | a <sub>u</sub> | 15.99083  | 0          |
| 1471.52 | a <sub>g</sub> | 0         | 0.50579618 |
| 1472    | a <sub>u</sub> | 575.89812 | 0          |
| 1472.1  | a <sub>g</sub> | 0         | 3.6054654  |
| 1474.93 | a <sub>u</sub> | 4.07833   | 0          |
| 1479.04 | a <sub>u</sub> | 43.16367  | 0          |
| 1479.29 | a <sub>g</sub> | 0         | 1.24606444 |
| 1500.67 | a <sub>g</sub> | 0         | 0.70947796 |
| 1501.24 | a <sub>u</sub> | 16.87563  | 0          |
| 1517.8  | a <sub>u</sub> | 0.56556   | 6.89E-21   |
| 1518.07 | a <sub>g</sub> | 0         | 57.4295772 |
| 1590.26 | a <sub>g</sub> | 0         | 3.22078582 |
| 1590.27 | a <sub>u</sub> | 4.80342   | 2.07E-18   |
| 1617.24 | a <sub>u</sub> | 13.62369  | 2.10E-19   |
| 1617.37 | a <sub>g</sub> | 0         | 33.1038381 |
| 2910.93 | a <sub>u</sub> | 46.8378   | 2.10E-19   |

|         |                |           |            |
|---------|----------------|-----------|------------|
| 2910.94 | a <sub>g</sub> | 0         | 3.53479603 |
| 2911.9  | a <sub>u</sub> | 218.84716 | 0          |
| 2912.11 | a <sub>g</sub> | 0         | 14.3425056 |
| 2923.61 | a <sub>u</sub> | 114.88845 | 0          |
| 2923.68 | a <sub>g</sub> | 0         | 2.79259698 |
| 2926.12 | a <sub>u</sub> | 108.41494 | 0          |
| 2926.29 | a <sub>g</sub> | 0         | 3.82790511 |
| 2934.01 | a <sub>u</sub> | 110.56998 | 0          |
| 2934.16 | a <sub>g</sub> | 0         | 1.60436913 |
| 2942.64 | a <sub>g</sub> | 0         | 0.45380886 |
| 2942.74 | a <sub>u</sub> | 24.91893  | 1.56E-21   |
| 2945.67 | a <sub>g</sub> | 0         | 1.13763267 |
| 2945.71 | a <sub>u</sub> | 18.86289  | 1.95E-21   |
| 2953.59 | a <sub>u</sub> | 22.88462  | 4.10E-20   |
| 2953.6  | a <sub>g</sub> | 0         | 2.04724188 |
| 2953.78 | a <sub>g</sub> | 0         | 1.5627679  |
| 2953.79 | a <sub>u</sub> | 22.28584  | 7.74E-21   |
| 2958.38 | a <sub>u</sub> | 109.04958 | 1.70E-22   |
| 2958.46 | a <sub>g</sub> | 0         | 3.10000683 |
| 2960.36 | a <sub>u</sub> | 94.54597  | 0          |
| 2960.47 | a <sub>g</sub> | 0         | 5.66151535 |
| 2986.67 | a <sub>g</sub> | 0         | 3.7035604  |
| 2986.69 | a <sub>u</sub> | 34.86884  | 1.73E-20   |
| 2990.26 | a <sub>g</sub> | 0         | 4.92853404 |
| 2990.28 | a <sub>u</sub> | 30.11886  | 0          |
| 3000.69 | a <sub>g</sub> | 0         | 1.30273649 |
| 3000.73 | a <sub>u</sub> | 30.12997  | 1.31E-21   |
| 3001.52 | a <sub>g</sub> | 0         | 0.60158484 |
| 3001.52 | a <sub>u</sub> | 17.73553  | 4.50E-20   |
| 3012.14 | a <sub>g</sub> | 0         | 0.76147666 |
| 3012.15 | a <sub>u</sub> | 30.84241  | 3.90E-21   |
| 3013.28 | a <sub>g</sub> | 0         | 1.47415618 |
| 3013.28 | a <sub>u</sub> | 28.54155  | 5.22E-18   |
| 3028.01 | a <sub>g</sub> | 0         | 0.45075525 |
| 3028.02 | a <sub>u</sub> | 7.78247   | 1.68E-21   |
| 3028.55 | a <sub>g</sub> | 0         | 0.51986557 |

|         |                |          |            |
|---------|----------------|----------|------------|
| 3028.6  | a <sub>u</sub> | 50.57439 | 0          |
| 3031.51 | a <sub>g</sub> | 0        | 0.83743011 |
| 3031.55 | a <sub>u</sub> | 19.4127  | 0          |
| 3034.19 | a <sub>u</sub> | 4.82585  | 2.54E-22   |
| 3034.21 | a <sub>g</sub> | 0        | 0.14256397 |
| 3034.49 | a <sub>g</sub> | 0        | 0.83674352 |
| 3034.52 | a <sub>u</sub> | 5.99545  | 3.06E-21   |
| 3036.28 | a <sub>u</sub> | 24.81525 | 1.86E-21   |
| 3036.29 | a <sub>g</sub> | 0        | 1.71248985 |
| 3038.25 | a <sub>g</sub> | 0        | 0.29457708 |
| 3038.28 | a <sub>u</sub> | 41.19416 | 2.90E-21   |
| 3041.17 | a <sub>u</sub> | 6.93671  | 6.20E-20   |
| 3041.18 | a <sub>g</sub> | 0        | 0.76544446 |
| 3043.09 | a <sub>g</sub> | 0        | 0.28761636 |
| 3043.27 | a <sub>u</sub> | 70.65415 | 0          |
| 3043.93 | a <sub>u</sub> | 9.72452  | 0          |
| 3044.06 | a <sub>g</sub> | 0        | 0.84059752 |
| 3044.61 | a <sub>u</sub> | 35.29388 | 0          |
| 3044.71 | a <sub>g</sub> | 0        | 0.27648679 |
| 3045.33 | a <sub>g</sub> | 0        | 0.4465864  |
| 3045.38 | a <sub>u</sub> | 31.46751 | 0          |
| 3072.71 | a <sub>g</sub> | 0        | 0.22048994 |
| 3072.72 | a <sub>u</sub> | 11.61565 | 9.47E-20   |
| 3078.06 | a <sub>g</sub> | 0        | 0.33365197 |
| 3078.06 | a <sub>u</sub> | 11.03412 | 1.10E-18   |
| 3090.41 | a <sub>g</sub> | 0        | 0.28431997 |
| 3090.41 | a <sub>u</sub> | 1.22603  | 1.36E-19   |
| 3099.3  | a <sub>g</sub> | 0        | 2.19139526 |
| 3099.3  | a <sub>u</sub> | 6.65961  | 1.69E-15   |
| 3104.61 | a <sub>g</sub> | 0        | 3.5509176  |
| 3104.61 | a <sub>u</sub> | 6.68422  | 3.81E-20   |
| 3108.25 | a <sub>u</sub> | 29.36978 | 1.54E-19   |
| 3108.26 | a <sub>g</sub> | 0        | 6.56250237 |
| 3110.08 | a <sub>g</sub> | 0        | 0.54235989 |
| 3110.08 | a <sub>u</sub> | 1.93676  | 1.71E-19   |
| 3114.48 | a <sub>g</sub> | 0        | 3.4530502  |

|         |                |         |            |
|---------|----------------|---------|------------|
| 3114.48 | a <sub>u</sub> | 18.9859 | 2.75E-18   |
| 3119.62 | a <sub>u</sub> | 31.6032 | 0          |
| 3119.65 | a <sub>g</sub> | 0       | 10.9296644 |

## References

1. S. Schäfer, R. Köppe and P. W. Roesky, *Chem. Eur. J.*, 2016, **22**, 7127-7133.
2. G. M. Sheldrick, *Acta Crystallogr A*, 2008, **64**, 112-122.
3. G. M. Sheldrick, *Acta Crystallogr A Found Adv*, 2015, **71**, 3-8.
4. O. V. Dolomanov, L. J. Bourhis, R. J. Gildea, J. A. K. Howard and H. Puschmann, *J. Appl. Crystallogr.*, 2009, **42**, 339-341.
5. G. Sheldrick, *Acta Crystallogr. Sect. C*, 2015, **71**, 3-8.
